# Supplementary material
Source: PubMed Central journal article supplement (PMC6615974)
Supplement: NIHMS1530165-supplement-2.pdf [file NIHMS1530165-supplement-2.pdf]

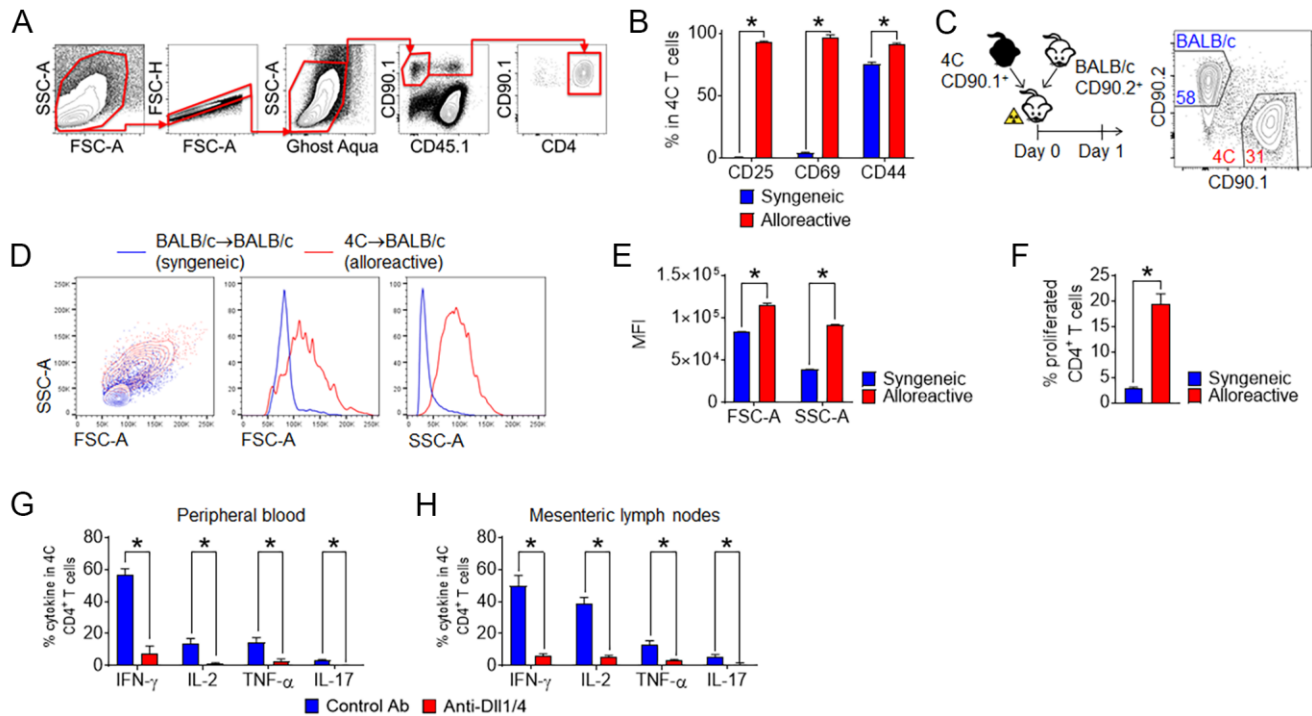

**Supplemental figure 1. Early hallmarks of the alloreactive 4C T cell response and cytokine production regulation by Dll1/4 blockade.** (A-B) BALB/c-CD45.1 and B6-SJL mice were lethally irradiated (8 Gy and 12 Gy, respectively) and transplanted with B6 WT TCD BM and  $5 \times 10^6$  4C T cells, with lymphoid organs harvested on day 1.5 for flow cytometric analysis. (A) Gating strategy to identify 4C T cells. (B) Percentage of 4C T cells expressing the activation markers CD25, CD69, and CD44 retrieved from syngeneic (B6-SJL) and allogeneic (BALB/c) recipients ( $*p < 0.001$ , Student's t-test). CD25 and CD69 upregulation were specific to alloantigen-mediated T cell activation, while CD44 expression was also increased after transfer into irradiated syngeneic recipients. (C-F) Irradiated BALB/c mice were transplanted with B6 WT TCD BM and a mixture of 4C (alloreactive) and BALB/c (syngeneic) T cells before analyses on day 1.5 post-transplantation. (C) Experimental design. (D-E) 4C, but not BALB/c T cells showed increased cell size (FSC-A) and granularity (SSC-A), hallmarks of alloantigen-driven activation. (F) Robust alloantigen-driven proliferation occurred early post-transplant with faster kinetics than homeostatic proliferation.  $*p < 0.001$ , Student's t-test. Data are representative of at least 2 experiments with 10 animals per group. (G-H) Lethally irradiated BALB/c mice were transplanted with TCD BM supplemented with  $2 \times 10^3$  4C T cells and treated with isotype control or anti-Dll1/4 antibodies on day 0. Animals were sacrificed 5 days after allo-HCT and peripheral blood and mesenteric lymph nodes retrieved for assessment of cytokine production. Notch blockade led to impaired cytokine production in 4C Tconv in peripheral blood (G) and mesenteric lymph nodes (H).  $*p < 0.05$ , Student's t-test.

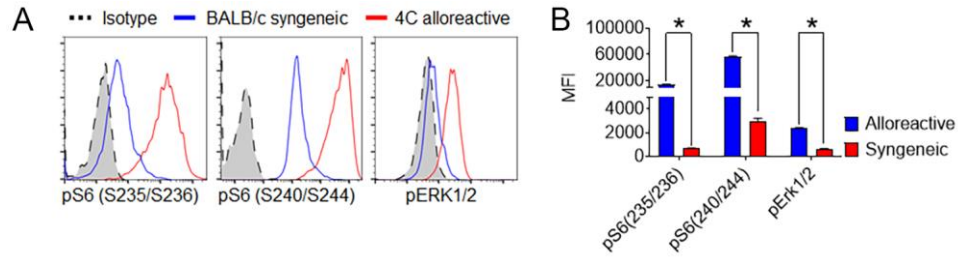

**Figure S2. Alloantigen-driven T cell response promotes mTORC1 and Ras/MPAK activation.** Irradiated BALB/c mice were transplanted with B6 WT TCD BM and a mixture of  $5 \times 10^6$  4C (alloreactive) and  $5 \times 10^6$  BALB/c (syngeneic) T cells before analysis 24 hours post-transplantation. Representative histogram plots (**A**) and cumulative data (**B**) showing the abundance of phosphorylated S6 (S235/S236 and S240/S244 residues) and pERK1/2 in alloreactive 4C and syngeneic BALB/c T cells retrieved from spleens and lymph nodes of transplanted BALB/c mice. \* $p < 0.05$ , Student's t-test.

| Antigen       | Clone        | Vendor      | Antigen                                            | Clone     | Vendor                         |
|---------------|--------------|-------------|----------------------------------------------------|-----------|--------------------------------|
| H-2Kb         | AF66-88.5    | Biolegend   | Phospho-Akt<br>(Ser473)                            | D9E       | Cell Signaling<br>Technologies |
| H-2Kd         | SF1-1.1      | Biolegend   |                                                    |           |                                |
| CD25          | PC61         | Biolegend   |                                                    |           |                                |
| CD4           | GK1.5        | Biolegend   |                                                    |           |                                |
| CD44          | IM7          | Biolegend   | Phospho-p44/42<br>MAPK (Erk1/2)<br>(Thr202/Tyr204) | D13.14.4E | Cell Signaling<br>Technologies |
| CD45.1        | A20          | Biolegend   |                                                    |           |                                |
| CD69          | H1.2F3       | Biolegend   |                                                    |           |                                |
| CD8a          | 53.6-7       | Biolegend   |                                                    |           |                                |
| CD90.1        | OX-1         | Biolegend   | Phospho-S6<br>Ribosomal<br>Protein<br>(Ser235/236) | D57.2.2E  | Cell Signaling<br>Technologies |
| CD90.2        | 30-H12       | Biolegend   |                                                    |           |                                |
| IFN-g         | XMG1.2       | Biolegend   |                                                    |           |                                |
| IL-17         | TC11-18H10.1 | Biolegend   |                                                    |           |                                |
| IL-2          | JES6-1A12    | Biolegend   | Phospho-S6<br>Ribosomal<br>Protein<br>(Ser240/244) | D68F8     | Cell Signaling<br>Technologies |
| TNF- $\alpha$ | MP6-XT22     | Biolegend   |                                                    |           |                                |
| Nur77         | 12.14        | eBioscience |                                                    |           |                                |
| VB13          | MR12-4       | Biolegend   |                                                    |           |                                |

**Supplemental table I.** Monoclonal antibodies used for flow cytometry analysis.
